# Supplementary material
Source: ML conference proceedings conference paper supplement (https://proceedings.neurips.cc/paper_files/paper/2016/hash/f26dab9bf6a137c3b6782e562794c2f2-Abstract.html)
Supplement: Supplementary file [file f26dab9bf6a137c3b6782e562794c2f2-Supplemental.zip]

---

# Appendix: The Forget-me-not Process

---

## 1 Source code

A reference implementation of both the *Partition Tree Weighting* and *Forget-me-not* algorithms as applied to the *Mysterious Bag of Coins* domain is provided at:

<https://github.com/jwveness/forget-me-not>.

## 2 Additional Experimental Details

### 2.1 Hyper-parameter Selection for the Fistful of Digits results

We performed a hyper-parameter sweep over the  $\alpha$ ,  $\beta$  and  $c$  parameters, with the reported values selected so as to minimize the average per digit loss. The size of the model pool  $k$  was chosen to be as large as possible given system memory constraints.

### 2.2 Optimization details for the Fistful of Digits results

The AdaGrad state is maintained separately per MADE model. Cloning a model copies both the weights and the AdaGrad state. A gradient step is taken for each model active in a mixture for each sample seen. These individual gradient steps can be combined into a single mini-batch operation when using the complexity reduction technique described on the final line of the *Complexity Reducing Operations* subsection.

## 3 Additional Details on Theoretical Results

### 3.1 Interpretation of Proposition 1

The constraints on the  $g$  function should be interpreted as the base model “having known regret properties”; many methods satisfy this, for example those that have their cumulative regret bounded by  $O(\log n)$  or  $O(\sqrt{n})$ . The restriction to memory bounded sources is a technicality to do with using finite length segments; for example, although there are regret bounds for algorithms that model infinite  $k$ -Markov sources, our result would not hold (though it would for finite  $k$ ). In practice the majority of base models one would reasonably consider are memory bounded for reasons of computational efficiency.
